1 **Title: Pivotal role of early coronary microvascular dysfunction in Takotsubo Syndrome**

2 Short title: Coronary flow retardation is central to Takotsubo Syndrome

3

4 Gao Jing Ong MBChB PhD<sup>1,2,3</sup>

5 Farnaz Jalili<sup>3</sup>

6 Gnanadevan Mahadavan MBBS PhD<sup>1,3</sup>

7 John D Horowitz MBBS PhD<sup>2,3</sup>

8

9 <sup>1</sup> Cardiology Unit, Central Adelaide Local Health Network, South Australia 5000, Australia.

10 <sup>2</sup> Cardiovascular Pathophysiology and Therapeutics Group, Basil Hetzel Institute for  
11 Translational Health Research, The Queen Elizabeth Hospital, Woodville South, South  
12 Australia 5011, Australia.

13 <sup>3</sup> University of Adelaide, Adelaide, South Australia 5000, Australia.

14

15 Address and contact details for Correspondence: John D Horowitz, Cardiology Research  
16 Laboratory, Basil Hetzel Institute, University of Adelaide, Adelaide, SA, Australia.

17 Email: [john.horowitz@adelaide.edu.au](mailto:john.horowitz@adelaide.edu.au)

18 Contact number: +61 457827046

19

20 Total word count: 5738

21 **Abstract**

22 Background: Takotsubo Syndrome (TTS) generally presents like a form of acute coronary  
23 syndrome, with variable extents of coronary flow retardation and concomitant release of  
24 markers from damaged endothelial glycocalyx (eGC). Whilst systemic hypotension often  
25 develops early, there is also rapid emergence and slow resolution of left ventricular (LV)  
26 dysfunction. It remains uncertain whether these hypotensive and LV functional  
27 complications reflect severity of early coronary vasculitis.

28 Methods: 284 patients admitted to 3 South Australian hospitals from May 2008 to May  
29 2021 with a diagnosis of TTS were evaluated. Coronary flow velocity was measured using  
30 the corrected TIMI frame count. Putative correlations between extent of acute coronary  
31 flow retardation and that of acute impairment of LV systolic function, as measured on global  
32 longitudinal strain (GLS: primary hypothesis), were determined. Other parameters of acute  
33 disturbance of homeostasis, including extent of eGC shedding and of myocardial edema,  
34 and residual impairment in GLS and quality of life at 3-months' follow-up, were correlated  
35 with extent of flow retardation. We also evaluated correlates of extent of acute systemic  
36 hypotension. Results were analysed via univariate followed by multivariate analyses.

37 Results: The patients studied exhibited mild coronary flow retardation relative to previously  
38 described norms at early angiography. On univariate analyses, corrected TIMI frame count  
39 correlated with extent of acute impairment of GLS ( $r=0.31$ ,  $p=0.003$ ) and this association  
40 persisted on backwards stepwise multiple logistic regression ( $\beta=0.52$ ,  $p=0.03$ ). Flow  
41 retardation also correlated with preservation of renal function ( $\beta=0.50$ ,  $p=0.02$ ), but tended  
42 to vary inversely with C-reactive protein (CRP) concentrations ( $\beta=-0.44$ ,  $p=0.06$ ). There were  
43 no significant associations between acute TIMI frame count and other acute or 3-months'

44 parameters. Neither TIMI frame count nor acute GLS predicted minimal systolic blood  
45 pressure.

46 Conclusions: The data demonstrated a strong association between extent of early coronary  
47 flow reduction in TTS and that of LV functional impairment, thus establishing some  
48 commonality of causation of the coronary and acute myocardial manifestations of TTS.  
49 However, neither extent of coronary vasculitis nor that of acute LV systolic dysfunction  
50 predict acute hypotensive changes in TTS.

51

52 Key words: Takotsubo Syndrome, Coronary flow retardation, Global longitudinal strain,  
53 Myocardial edema

54

55 **Clinical Perspective**

56 What is new?

- 57 • We have shown for the first time, that the extent of acute coronary flow retardation  
58 in Takotsubo Syndrome (TTS) predicts that of early impairment in left ventricular (LV)  
59 systolic function.
- 60 • However, severity of acute hypotension is independent of both coronary flow  
61 reduction and LV functional impairment.

62 What are the clinical implications?

- 63 • These results confirm that the initial pathophysiology of TTS is that of coronary  
64 vasculitis, and that the severity of this vasculitis predicts the extent of LV dysfunction.
- 65 • Therefore, future therapeutic investigations in TTS should focus on early intervention  
66 to limit coronary vasculitis.
- 67 • Hypotension/shock in acute TTS appear to have little to do with extents of acute  
68 coronary vasculitis or of LV systolic dysfunction, and therefore theoretically, neither  
69 coronary vasodilatation nor positive inotropic therapy is likely to ameliorate this  
70 problem.

71

## 72 **Introduction**

73 Takotsubo Syndrome (TTS) is an acute inflammatory cardiac condition that is usually  
74 characterized by an acute coronary syndrome (ACS)-like presentation, followed by a  
75 congestive cardiac failure (CCF) aftermath(1). Like patients with acute myocardial infarction  
76 (MI), TTS patients typically present with symptoms of chest discomfort and/or dyspnea, with  
77 electrocardiographic (ECG) changes, and biochemical evidence of myocardial injury(1).

78 There is also acute evidence of segmental (typically apical) left ventricular (LV) systolic  
79 dysfunction, which tends to resolve only partially within 3 months(2, 3), with associated  
80 symptoms of dyspnea and lethargy(4).

81 The major clinical problem encountered during the acute phase of TTS is symptomatic  
82 hypotension/shock, which is a marker of increased short-term mortality(5), even though it is  
83 not closely related to extent of simultaneous LV systolic dysfunction(6), nor to impairment  
84 of cardiac output(7).

85 Although TTS often occurs in the absence of stenoses in large epicardial coronary arteries,  
86 there is evidence of acute regional myocardial ischemia(8, 9), with variable retardation of  
87 epicardial coronary flow rates(10). These changes occur in parallel with ECG abnormalities  
88 resembling those of evolving acute MI. These findings beg the question of: What precisely  
89 causes the associated ischemia?

90 Pathological retardation of coronary flow rates [the “coronary slow flow  
91 phenomenon”(CSFP)(11)] may occur as a component of reperfusion injury post MI(12), but  
92 also as an infarct-independent form of acute-on-chronic small coronary artery disease(13).

93 We have recently demonstrated that this “acute on chronic CSFP” results from  
94 microvascular spasm, with associated but reversible damage to the *endothelial glycocalyx*

95 (eGC), a carbohydrate-rich layer between endothelial cells and the vascular lumen(14).  
96 Damage to the eGC results in (i) impairment of vascular rheology(15) and hence  
97 theoretically increased microvascular resistance, (ii) increased expression of thioredoxin-  
98 interacting protein (TXNIP), which in turn activates the NLRP3 inflammasome(16), and (iii)  
99 increased vascular permeability(17), facilitating development of tissue edema, and  
100 extravasation of leukocytes. *All of these* have been described in the acute phases of TTS(18-  
101 20).

102 TTS therefore appears to present as an acute coronary “vasculitis”, and then a subsequent  
103 and prolonged myocarditis(21). If this is the case, it is possible, although currently unproven,  
104 that the extent of acute coronary vasculitis is a determinant of both severity of subsequent  
105 myocarditis (and associated LV systolic dysfunction) and of the risk of severe acute  
106 hypotension.

107 In the current study, utilising a large and detailed database of TTS patients, we sought to  
108 test the hypotheses that:

109 (1) Vasculitis predicts myocarditis

110 (a) The extent of acute coronary flow retardation correlates directly with that of  
111 acute LV systolic dysfunction, as measured by global longitudinal strain (GLS) on  
112 echocardiography (primary hypothesis). Echocardiographic left ventricular  
113 ejection fraction (LVEF), a less precise marker of LV systolic function, was also  
114 assessed.

115 (b) The extent of acute coronary flow retardation correlates directly with other  
116 acute markers of:

117 i. Biochemical evidence, and clinical and radiological consequences, of eGC

118 damage, namely:

119 a. Minimal systolic BP during the hospitalization

120 b. Myocardial edema score on acute cardiac magnetic resonance

121 imaging (CMR)

122 c. Plasma concentration of the eGC component syndecan-1 (SD-1)

123 ii. Markers of extent of myocardial injury:

124 a. Peak plasma concentration of Troponin-T

125 b. Peak plasma concentration of NT-proBNP

126 c. Plasma concentration of the catecholamine metabolite

127 normetanephrine

128 iii. Platelet NO responsiveness, which is typically impaired proportionally to

129 extent of redox stress(22).

130 (c) The extent of early coronary flow retardation predicts residual impairment 3

131 months post TTS:

132 i. GLS on echocardiography

133 ii. Quality of life scores as measured using the SF-36 questionnaire, with a

134 particular focus on the physical component scores (SF36-PCS)

135 (2) Vasculitis predicts hypotension/shock independent of myocarditis

136 We reasoned that if the major mechanism responsible for development of acute

137 hypotension was increased vascular permeability, this would imply that extent of

138 hypotension might be independent of that of LV systolic dysfunction.

139 The results of these two types of analyses establish that (i) the extent of coronary flow

140 retardation parallels that of acute impairment of LV systolic function in TTS patients, and (ii)



141 that extent of acute hypotension is independent, both of impairment of LV systolic function

142 and of coronary flow retardation.

143

## 144 **Methods**

### 145 *Patient selection and baseline characteristics*

146 This study was approved by the local human research ethics committee. Data from  
147 consecutive TTS patients (n=400) who presented to 3 tertiary hospitals in South Australia  
148 between May 2008 to May 2021 were assessed. Of these, patients who had early invasive  
149 coronary angiography, with adequate image quality for accurate image interpretation and  
150 frame counting were included in the analysis (n=284). A study flow chart summary is shown  
151 in Figure 1. The diagnosis of TTS was made according to the InterTAK diagnostic criteria(1).  
152 Baseline demographics, including age, sex and comorbidities including diabetes and smoking  
153 status were recorded. Data regarding predominant site of left ventricular (LV) hypokinesis  
154 and known precipitants of TTS were also recorded.

155 Patients were routinely admitted to the coronary care or intensive care units, where blood  
156 pressures (BP) were recorded hourly, and ECGs performed at least daily. Venesection was  
157 performed routinely for measurement of hemoglobin (Hb), C-reactive protein (CRP) and  
158 estimated glomerular filtration rate (eGFR) from plasma creatinine concentrations, as well  
159 as plasma NT-proBNP, Troponin-T, and normetaphrine concentrations. In subsets of patients,  
160 the following were also measured during the first 24 hours post onset of symptoms, in all  
161 cases related to testing of specific hypotheses concerning the pathogenesis of TTS(18, 23):

- 162 (1) Extent of damage to the eGC, measured using plasma SD-1 concentrations (n=38)
- 163 (2) Platelet nitric oxide (NO) responsiveness, measured by the extent of inhibition of  
164 platelet aggregation with the NO donor, sodium nitroprusside (SNP) (n=48)

165 Plasma SD-1 concentrations were measured using immunoassay (sCD138 ELISA Kit, Diaclone  
166 Research, France). The extent of inhibition of ADP-induced platelet aggregation with SNP  
167 was measured using a dual channel impedance aggregometer (Model 560, Chrono-Log,  
168 Havertown, PA, USA), as previously described(24).

169

#### 170 *Invasive coronary angiography*

171 Coronary angiography was generally performed on an emergency basis. The time from  
172 hospital presentation to invasive coronary angiography was recorded. Coronary angiography  
173 was performed with standard sequences of angiographic views, and cine images were  
174 acquired at various frame rates, ranging between 10 frames per second and 30 frames per  
175 second. Coronary artery flow velocity was assessed based on TIMI Frame Count (TFC), a  
176 method previously described by Gibson et al(25). TFC is the number of cineframes required  
177 for contrast to first reach a standardized distal coronary landmark in the coronary vessel of  
178 interest. The first frame used in TFC counting is the first frame where contrast dye fully  
179 enters the coronary artery, and for the left anterior descending (LAD) coronary artery for  
180 example, the final frame is when the contrast dye reaches the most distal visible LAD  
181 bifurcation. As the length of the LAD is typically greater than the left circumflex (LCx) and  
182 the right coronary (RCA) arteries, a correction ratio of 1:1.7 is used to standardize the TFC in  
183 LAD and non-LAD vessels(25).

184 TFCs were measured by both FJ and GO with mean inter-observer variability of 9% of TFC.

185 Due to the variability in image acquisition rate, the number of frame counts was adjusted to  
186 the equivalence of 30 frames per second(25).

187

188 *Echocardiography*

189 Transthoracic echocardiography was performed in all patients at acute presentation (usually  
190 <48 hours of presentation) and again at 3 months follow-up. Standard apical two-chamber,  
191 three-chamber, and four-chamber views were obtained with special attention to LV  
192 endocardial definition, at a frame rate of at least 50 frames per second. Global longitudinal  
193 strain (GLS) was analysed using speckle-tracking software (Philips or GE) specific to each  
194 manufacturer. The endocardial border was manually traced, and region of interest was  
195 drawn to include the entire myocardium in all cases. Images were only accepted for analysis  
196 when segments approved for speckle analysis were tracked reliably. In addition, left  
197 ventricular ejection fraction (LVEF) was also measured using echocardiography, and was  
198 calculated using the biplane method.

199

200 *Cardiac magnetic resonance (CMR) imaging*

201 CMR was performed in patients without any contraindications to this procedure during their  
202 initial hospital admission, on a 1.5T Philips MRI system, with a five-channel phased- array  
203 coil and electrocardiographic gating. T2-weighted-Black-Blood images were analysed to  
204 determine the extent of myocardial inflammation, utilising certified MRI evaluation  
205 software [OsiriX Lite (<http://www.osirix-viewer.com/>)]. In each patient, short axis views of  
206 the left ventricle were obtained at the apex, mid and base, and the endocardial and  
207 epicardial contours were traced manually in all 3 levels. In order to provide a measure of  
208 total LV edema, we utilized methodology previously developed by Neil et al(26): Mean

209 signal intensity (SI) score was determined for each short-axis slice, and results were  
210 expressed relative to the SI score of their spleen, giving a SI ratio (or a “T2WSI score”).

211

#### 212 *Follow up*

213 Patients were followed up 3 months after the acute TTS attack, with LV systolic function  
214 measured by GLS, and quality of life assessed using the SF-36 Questionnaire with a  
215 particular focus on the physical component scores (SF36-PCS), both included in the analysis.

216

#### 217 *Statistical analyses*

218 To test the central hypothesis that extent of coronary microvascular dysfunction during  
219 acute TTS is directly associated with the extent of myocardial dysfunction, correlations were  
220 sought between TFC on invasive coronary angiography with GLS on echocardiography.  
221 Correlation analyses were performed by Pearson’s or Spearman’s correlation coefficients  
222 as appropriate. Correlations were also sought for the secondary measures mentioned above  
223 and listed in Figure 1. Associations between TFC and patient demographics were also sought  
224 with unpaired t-test and Wilcoxon-Mann-Whitney test as appropriate. Subsequently, those  
225 univariate parameters with a p-value  $\leq 0.10$  were included in a multivariate backwards  
226 stepwise multiple logistic regression analysis to identify multivariate correlates of TFC.

227 In order to test the subsidiary hypothesis that extent of acute hypotension is independent of  
228 extent of impairment in GLS, we performed univariate correlations of minimal systolic BP  
229 with GLS, followed by backwards stepwise multiple logistic regression analysis, utilizing  
230 minimal systolic BP as the dependent variable, and including age, pre-existing diagnosis of

231 hypertension, average (LAD-corrected) TFC, acute GLS, and peaked plasma NT-proBNP and  
232 Troponin-T concentrations as potential correlates.

233 Data are presented as mean  $\pm$  SD or median (inter-quartile range) as appropriate, and the  
234 limit of statistical significance was set at  $p < 0.05$ .

235 **Results**

236 *Patient characteristics and coronary angiography findings*

237 A total of 284 TTS patients were included in the analysis. Patient demographics are  
238 summarized in Table 1. As expected, the majority of patients were older females, with few  
239 conventional cardiovascular risk factors other than advanced age.

240 153 (53%) patients had an invasive coronary angiogram within the first 24 hours of their  
241 presentation. Frame counts did not differ significantly between patients who had  
242 angiography within 24 hours and those who did not.

243 The corrected TFC of the LAD correlated closely with the averaged TFC in other major  
244 epicardial arteries ( $r=0.83$ ,  $p<0.0001$ ). Given the fact that TTS- associated myocardial edema  
245 is seen not just in the hypokinetic left ventricular segments, but also throughout the  
246 myocardium(26), the averaged (LAD-corrected) TFC of all coronary arteries was chosen as  
247 the main dependent variable.

248 Median averaged (LAD-corrected) TFC of all 3 major coronary arteries was 33 frames (IQR  
249 23.5-37.7), which is higher compared to previously reported data for healthy subjects (<21  
250 frames)(25).

251 TFC did not significantly correlate with age ( $p=0.23$ ), gender ( $p=0.20$ ), smoking status ( $p=0.9$ )  
252 or diabetes status ( $p=0.50$ ). TFC also did not differ between apical and non-apical forms of  
253 TTS ( $p=0.21$ ). However, TFC was less elevated (median 30 vs 33 frames,  $p=0.003$ ) in patients  
254 with TTS precipitated by a physical trigger than in other subgroups ( $p=0.03$ ).

255 Renal function was preserved in the majority of patients (median eGFR 67mL/min), and TFC  
256 varied directly with eGFR on univariate correlation ( $r=0.24$ ,  $p<0.0001$ )(Figure 2A). Plasma  
257 CRP concentration correlated inversely with TFC ( $r=-0.21$ ,  $p=0.001$ ).

258

259 *Primary hypothesis: Does acute vasculitis predict subsequent myocarditis?*

260 (a) CSFP predicts extent of acute systolic functional impairment

261 The extent of coronary flow retardation correlated directly with that impairment of LV  
262 systolic function on index echocardiography, as measured by GLS on univariate analysis  
263 (Figure 3). However, this trend did not approach statistical significance when LVEF replaced  
264 GLS ( $p=0.27$ ).

265

266 (b) Other acute comparisons

267 Hypotension (systolic BP  $\leq 90$ mmHg) occurred in 37% of patients, with mean nadir of systolic  
268 BP of 96mmHg in the studied population. Patients who had lower systolic BP tended to have  
269 higher TFC ( $r=-0.12$ ,  $p=0.06$ ) (Figure 2B). There was however no significant correlation  
270 between TFC and either T2WSI score on CMR ( $p=0.75$ ) or plasma SD-1 concentration  
271 ( $p=0.33$ ).

272 Biochemical markers of extent of acute myocardial injury (peak plasma Troponin-T, NT-  
273 proBNP, and normetanephrine concentrations) also did not correlate significantly with TFC  
274 ( $p=0.43$ ,  $p=0.16$ , and  $p=0.37$  respectively).



275 In a subset of patients (n=48) where platelet NO responsiveness was measured, whilst there  
276 was no statistically significant correlation between TFC and NO responsiveness, there was a  
277 trend towards greater flow retardation(p=0.07) in patients with most pronounced  
278 responsiveness to NO.

279

280 (c) Indices of late recovery

281 At 3 months' follow up, mean GLS was  $-17.91\% \pm 3.14\%$ , consistent with persistent but mild  
282 LV systolic dysfunction in many patients. Similarly, quality of life scores were also mildly  
283 impaired, with a mean SF36-PCS score of 56.1, as compared to the "normal" mean value of  
284 65 for the female population aged 65-74 of the region of sampling(27). However, there was  
285 no statistically significant correlation between extent of acute coronary flow retardation and  
286 either GLS or quality of life scores at 3 months post-TTS (p=0.60 and p=0.67 respectively).

287

288 (d) Multivariate analysis

289 Acute GLS, TTS triggers, eGFR, lowest in-hospital systolic BP, and plasma CRP concentration  
290 were included in a backwards stepwise multiple logistic regression analysis, where the  
291 dependent variable was corrected TFC. The result of this multivariate analysis is summarized  
292 in Table 3. Both acute GLS and eGFR were independent and direct correlates of TFC acutely  
293 ( $\beta=0.52$ , p=0.03 and  $\beta=0.50$ , p=0.02 respectively). Surprisingly there was as trend (p=0.06)  
294 for low CRP values to correspond to high acute TFC. Importantly, there was no correlation  
295 between minimal systolic BP and TFC.

296

297 *Secondary hypothesis: Vasculitis predicts hypotension/shock independent of myocarditis*

298 The issue was approached by initial univariate correlation between TFC and minimal systolic  
299 BP followed by multivariate analysis of correlates of minimal systolic BP. As previously  
300 mentioned, TFC tended ( $r=-0.12$ ,  $p=0.06$ ) to be inversely correlated with minimal systolic BP  
301 (Figure 2B). However, there was no significant univariate correlation between GLS and  
302 minimal systolic BP (data not shown). On multivariate analysis, the absence of previous  
303 systolic hypertension, and extent of acute Troponin-T rise were the only identified  
304 significant correlates of minimal systolic BP ( $\beta=0.33$ ,  $p=0.002$  and  $\beta=-0.27$ ,  $p=0.01$   
305 respectively).

306

307 **Discussion**

308 The precise pathophysiology of what is now usually named “Takotsubo Syndrome” remains  
309 uncertain. The Japanese investigators who initially described the condition, including the  
310 eponymous distortion of ventricular contraction, considered the ACS-like presentation and  
311 suggested that the pathogenesis might be of multivessel coronary spasm(28). In retrospect,  
312 this was surprising, because coronary artery spasm occurs very commonly in Japan(29), and  
313 does not usually lead to myocardial necrosis(30). Conversely, a subsequent generation of  
314 (largely European) investigators focused on the emergence, typically during the late  
315 hospitalization period, of heart failure, and categorized the condition as a congestive  
316 cardiomyopathy (TTC), a term which only recently has declined in use(31).

317 Very recently, we have proposed that *TTS begins as an acute coronary vasculitis, and*  
318 *evolves into a myocarditis of variable severity and duration*(21). However, little has been  
319 done to determine whether the putative second phase results from the first. In the current  
320 study, our primary hypothesis was that extent of coronary flow retardation would predict  
321 that of early GLS impairment. This proved to be the case. Thus, the rapid development of  
322 segmental LV systolic dysfunction either directly reflects an identical stimulus, and/or  
323 represents a predictable consequence of early coronary vasculitis.

324 Whilst injury to the vascular eGC may have contributed to impaired myocardial contractility  
325 via vascular permeabilization(17), for example by facilitating monocyte and macrophage  
326 transmigration(20), and increasing expression of the humoral pro-inflammatory protein  
327 TXNIP(16), it is equally probable that flow retardation per se may have attenuated the Gregg  
328 phenomenon(32), and thus impaired LV contractility.

329 Subsidiary investigations undertaken in this context sought correlations between TFC and a  
330 number of biochemical parameters. The only significant correlations found were with CRP  
331 concentrations, which were inversely related to TFC, and with eGFR, which was strongly and  
332 directly related to TFC. The reasons underlying those findings are not clear-cut. As regards  
333 eGFR, a possible explanation for this finding may be that hemodynamic changes in patients  
334 with CKD induce physiological adjustments similar to those occurring in the “diving reflex”,  
335 in that peripheral (catecholamine-induced) vasoconstriction predominates in patients with  
336 CKD, leading to redistribution of blood flow to adequately perfuse the heart and the  
337 brain(33). Indeed, there is also evidence of increased resting cerebral blood flow in patients  
338 with CKD(34). The lack of an explanation for the findings regarding CRP correlations may  
339 relate to the precipitation of TTS in a minority of patients by infections, but this remains  
340 speculative at this stage. More extensive TFC prolongation tended to be associated ( $p=0.07$ )  
341 with platelet hyper-responsiveness to NO, which has been implicated as being generated via  
342 aberrant  $\beta$ -adrenoceptor stimulation and NO synthase activation(35, 36). This forms a basis  
343 of peroxynitrite generation and thus incremental oxidative stress(19). This marginal  
344 association is therefore not surprising.

345 Additionally, there was no correlation between extent of acute flow retardation and that of  
346 LV systolic dysfunction and quality of life impairment after 3 months. Data from Dawson’s  
347 group have revealed that both persistent myocardial energetic impairment and the  
348 emergence of myocardial fibrosis are prominent late pathogenetic features in TTS(3):  
349 presumably neither of these are closely related to extent of acute coronary vasculitis.

350 A secondary purpose of the current study was to provide additional understanding of the  
351 factors responsible for the development of severe hypotension in the early stages of TTS.

352 We have previously shown that occurrence of severe hypotension is independent of acute  
353 changes in pulmonary artery oxygen saturation (a marker of cardiac output)(7) and is  
354 statistically related to fall in LVEF, but only weakly so(6). The current analysis showed that  
355 minimal systolic blood pressure is significantly lower in patients without past histories of  
356 hypertension, and also in patients with greater increases in plasma troponin-T  
357 concentrations. The latter data are not unexpected, and unfortunately the  
358 hypotension:troponin release nexus does not help elucidate cause vs effect. The current  
359 quantitative and multivariate analysis does not provide significant clarification regarding  
360 mechanism(s) of hypotension, which was independent both of TFC and of GLS.  
361 Unfortunately, the current methodology did not permit us to measure extent of fluid  
362 extravasation associated with coronary microvascular injury: this might have provided  
363 significant mechanistic information. Nevertheless, the current data provide additional  
364 evidence that extent of hypotension is not closely related to that of LV systolic dysfunction.  
365 The issue of coronary vasculitis as a basis for subsequent myocardial dysfunction in TTS has  
366 been appreciated in two previous studies, independent of our previous postulate of  
367 sequential pathogenesis(21). In 2020, Montone et al. demonstrated in a cohort of 101 TTS  
368 patients, that acute coronary flow retardation (TIMI-2 flow) was associated with an  
369 increased risk of in-hospital acute heart failure(37). Sans-Rosello et al. evaluated changes in  
370 coronary microvascular resistance in 166 TTS patients, and showed that increased  
371 microvascular resistance predicted the occurrence of symptomatic heart failure (usually  
372 mild) over subsequent 12 months(38). The importance of this study can now be seen as  
373 providing an extension of our current acute/subacute findings for a period of at least 12  
374 months(39). Finally, a very recent report(40) in a mouse model of transaortic constriction  
375 demonstrated gradual development of LV apical hypokinesis, which was reversed by 2-4

376 weeks' treatment with the coronary vasodilator agent chromonar. Although it may be  
377 hazardous to extrapolate from this experimental design to TTS, the findings might be  
378 interpreted as additional evidence of a nexus between reversal of early coronary  
379 vasoconstriction and of impaired systolic function in a "TTS-like" model.

380 There are several caveats to our study. Firstly, due to the retrospective design of our study,  
381 our finding of directly related impairment of coronary flow and myocardial dysfunction  
382 implies only association, rather than causation. It might be possible to test Koch's postulates  
383 regarding causation by evaluating the impact of eGC-protecting agents, such as the matrix  
384 metalloproteinase inhibitor doxycycline(41), the hydrogen sulphide donor N-  
385 acetylcysteine(42), or even potentially sodium-glucose cotransporter-2 inhibitors (SGLT-2i)  
386 such as empagliflozin(43).

387 Secondly, flow retardation as measured by TFC does not always represent microvascular  
388 dysfunction, and other potential contributors such as coronary vascular ectasia(44), or  
389 extramural compression of coronaries in association with diastolic dysfunction(45) may  
390 need to be considered. Furthermore, myocardial edema quantitation utilized T2-weighted  
391 signal intensity score measurement, as in our previous report(26):- it is possible that more  
392 recently developed techniques such as T2-mapping sequences might have been more  
393 precise(46). Finally, as the data on some secondary end points such as plasma SD-1  
394 concentrations, myocardial edema score on CMR, and platelet NO responsiveness were only  
395 available in small numbers of patients, these analyses were subject to Type 2 error.

396 In conclusion, we have shown for the first time, an acute association between coronary flow  
397 retardation and myocardial systolic dysfunction in patients with TTS. Furthermore, the  
398 extent of flow retardation is not a significant correlate of severity of hypotension. Thus, our

399 results establish a nexus between coronary vasculitis and myocarditis as a central  
400 component of the pathogenesis of TTS, and suggest that limitation of coronary  
401 microvascular dysfunction may represent an important early therapeutic target for patients  
402 with TTS in the future.

403

#### 404 **Acknowledgements**

405 We wish to acknowledge the contributions of Dr Yuliy Chirkov and Dr Ha Nguyen, who  
406 performed the investigations of platelet physiology and of plasma SD-1 concentrations. We  
407 also are grateful to the medical and nursing staff, as well as echocardiography and CMR  
408 technicians at Lyell McEwin Hospital, Queen Elizabeth Hospital, and Royal Adelaide Hospitals.  
409 Finally, we are very grateful to Ms Jeanette Stansborough for her substantial contributions  
410 to patient recruitment and data entry.

411

#### 412 **Sources of Funding**

413 GJO was partly supported by an Australian Postgraduate Scholarship from the University of  
414 Adelaide.

415 FJ was supported by a short-term research scholarship from the Faculty of Medicine,  
416 University of Adelaide.

417

#### 418 **Disclosures**

419 All authors have no conflicts of interest to declare.

## 420 References

- 421 1. Ghadri J-R, Wittstein IS, Prasad A, Sharkey S, Dote K, Akashi YJ, et al. International Expert  
422 Consensus Document on Takotsubo Syndrome (Part I): Clinical Characteristics, Diagnostic Criteria,  
423 and Pathophysiology. *European heart journal*. 2018;39(22):2032-46.
- 424 2. Dawson DK, Neil CJ, Henning A, Cameron D, Jagpal B, Bruce M, et al. Tako-Tsubo  
425 Cardiomyopathy: A Heart Stressed Out of Energy? *JACC: Cardiovascular Imaging*. 2015;8(8):985-7.
- 426 3. Scally C, Rudd A, Mezincescu A, Wilson H, Srivanasan J, Horgan G, et al. Persistent Long-Term  
427 Structural, Functional, and Metabolic Changes After Stress-Induced (Takotsubo) Cardiomyopathy.  
428 *Circulation*. 2018;137(10):1039-48.
- 429 4. Neil CJ, Nguyen TH, Singh K, Raman B, Stansborough J, Dawson D, et al. Relation of Delayed  
430 Recovery of Myocardial Function After Takotsubo Cardiomyopathy to Subsequent Quality of Life.  
431 *The American journal of cardiology*. 2015;115(8):1085-9.
- 432 5. Di Vece D, Citro R, Cammann Victoria L, Kato K, Gili S, Szawan Konrad A, et al. Outcomes  
433 Associated With Cardiogenic Shock in Takotsubo Syndrome. *Circulation*. 2019;139(3):413-5.
- 434 6. Ong GJ, Girolamo O, Stansborough J, Nguyen TH, Horowitz JD. Incidence and  
435 clinical/laboratory correlates of early hypotension in takotsubo syndrome. *ESC Heart Failure*.  
436 2021;8(3):2009-15.
- 437 7. Chong CR, Neil CJ, Nguyen TH, Stansborough J, Law GW, Singh K, et al. Dissociation between  
438 severity of takotsubo cardiomyopathy and presentation with shock or hypotension. *Clinical*  
439 *cardiology*. 2013;36(7):401-6.
- 440 8. Abdelmoneim SS, Mankad SV, Bernier M, Dhoble A, Hagen ME, Ness SA, et al. Microvascular  
441 function in Takotsubo cardiomyopathy with contrast echocardiography: prospective evaluation and  
442 review of literature. *Journal of the American Society of Echocardiography : official publication of the*  
443 *American Society of Echocardiography*. 2009;22(11):1249-55.
- 444 9. Rodríguez LO, Fernández RG, Luis JJ, González AP. Tako-tsubo syndrome: atypical nuclear  
445 medicine findings. *World journal of nuclear medicine*. 2012;11(1):35-8.
- 446 10. De Caterina AR, Leone AM, Galiuto L, Basile E, Fedele E, Paraggio L, et al. Angiographic  
447 assessment of myocardial perfusion in Tako-Tsubo syndrome. *Int J Cardiol*. 2013;168(5):4717-22.
- 448 11. Beltrame JF. Defining the coronary slow flow phenomenon. *Circulation journal : official*  
449 *journal of the Japanese Circulation Society*. 2012;76(4):818-20.
- 450 12. Jaffe R, Charron T, Puley G, Dick A, Strauss BH. Microvascular Obstruction and the No-Reflow  
451 Phenomenon After Percutaneous Coronary Intervention. *Circulation*. 2008;117(24):3152-6.
- 452 13. Beltrame JF, Limaye SB, Horowitz JD. The coronary slow flow phenomenon--a new coronary  
453 microvascular disorder. *Cardiology*. 2002;97(4):197-202.
- 454 14. Imam H, Nguyen TH, Stafford I, Liu S, Heresztyn T, Chirkov YY, et al. Impairment of platelet  
455 NO signalling in coronary artery spasm: role of hydrogen sulphide. *British journal of pharmacology*.  
456 2021;178(7):1639-50.
- 457 15. Lipowsky HH, Gao L, Lescanic A. Shedding of the endothelial glycocalyx in arterioles,  
458 capillaries, and venules and its effect on capillary hemodynamics during inflammation. *American*  
459 *journal of physiology Heart and circulatory physiology*. 2011;301(6):H2235-45.
- 460 16. Chong CR, Chan WP, Nguyen TH, Liu S, Procter NE, Ngo DT, et al. Thioredoxin-interacting  
461 protein: pathophysiology and emerging pharmacotherapeutics in cardiovascular disease and  
462 diabetes. *Cardiovascular drugs and therapy*. 2014;28(4):347-60.
- 463 17. Curry FE, Adamson RH. Endothelial glycocalyx: permeability barrier and mechanosensor. *Ann*  
464 *Biomed Eng*. 2012;40(4):828-39.
- 465 18. Nguyen TH, Liu S, Ong GJ, Stafford I, Frenneaux MP, Horowitz JD. Glycocalyx shedding is  
466 markedly increased during the acute phase of Takotsubo cardiomyopathy. *Int J Cardiol*.  
467 2017;243:296-9.



- 468 19. Surikow SY, Nguyen TH, Stafford I, Chapman M, Chacko S, Singh K, et al. Nitrosative Stress as  
469 a Modulator of Inflammatory Change in a Model of Takotsubo Syndrome. *JACC: Basic to*  
470 *Translational Science*. 2018;3(2):213-26.
- 471 20. Wilson HM, Cheyne L, Brown PAJ, Kerr K, Hannah A, Srinivasan J, et al. Characterization of  
472 the Myocardial Inflammatory Response in Acute Stress-Induced (Takotsubo) Cardiomyopathy. *JACC*  
473 *Basic Transl Sci*. 2018;3(6):766-78.
- 474 21. Girolamo OC, Surikow SY, Ong G-J, Nguyen TH, Kucia AM, Chirkov YY, et al. TakoTsubo  
475 Syndrome: First an Acute Coronary Vasculitis and Then Prolonged Myocarditis? *RCM*. 2022;23(5).
- 476 22. Förstermann U. Nitric oxide and oxidative stress in vascular disease. *Pflugers Archiv* :  
477 *European journal of physiology*. 2010;459(6):923-39.
- 478 23. Nguyen T, Neil CJ, Sverdlov AL, Ngo D, Chan WP, Heresztyn T, et al. Enhanced NO Signaling in  
479 Patients with Takotsubo Cardiomyopathy: Short-Term Pain, Long-Term Gain? *Cardiovasc Drugs Ther*.  
480 2013;27(6):541-7.
- 481 24. Chirkov YY, Holmes AS, Chirkova LP, Horowitz JD. Nitrate resistance in platelets from  
482 patients with stable angina pectoris. *Circulation*. 1999;100(2):129-34.
- 483 25. Gibson CM, Cannon CP, Daley WL, Dodge JT, Alexander B, Marble SJ, et al. TIMI Frame Count.  
484 *Circulation*. 1996;93(5):879-88.
- 485 26. Neil C, Nguyen T, Kucia A, Crouch B, Sverdlov A, Chirkov Y, et al. Slowly resolving global  
486 myocardial inflammation/oedema in Tako-Tsubo cardiomyopathy: evidence from T2-weighted  
487 cardiac MRI. *Heart (British Cardiac Society)*. 2012;98(17):1278-84.
- 488 27. Del Grande E, Taylor A. Quality of life in South Australia as measured by SF-36: population  
489 norms for 2002, trends from 1994 to 2002 and impact of chronic diseases and health risk factors on  
490 quality of life. In: *Population Research and Outcome Studies Unit DoHSSA, editor. South Australia:*  
491 *Department of Human Services South Australia; 2004.*
- 492 28. Sato H, Tateishi H, Uchida T. Takotsubo-type cardiomyopathy due to multivessel spasm:  
493 Kodama K, Haze K, Hon M, Clinical aspect of myocardial injury: from ischaemia to heart failure (in  
494 Japanese Tokyo: Kagakuhyouronsya Co, 1990: 56–64. 1990.
- 495 29. Yasue H, Nakagawa H, Itoh T, Harada E, Mizuno Y. Coronary artery spasm—clinical features,  
496 diagnosis, pathogenesis, and treatment. *Journal of cardiology*. 2008;51(1):2-17.
- 497 30. Nakayama N, Kaikita K, Fukunaga T, Matsuzawa Y, Sato K, Horio E, et al. Clinical Features and  
498 Prognosis of Patients With Coronary Spasm–Induced Non–ST-Segment Elevation Acute Coronary  
499 Syndrome. *Journal of the American Heart Association*.3(3):e000795.
- 500 31. Pelliccia F, Sinagra G, Elliott P, Parodi G, Basso C, Camici PG. Takotsubo is not a  
501 cardiomyopathy. *International Journal of Cardiology*. 2018;254:250-3.
- 502 32. Gregg DE. Effect of Coronary Perfusion Pressure or Coronary Flow on Oxygen Usage of the  
503 Myocardium. *Circ Res*. 1963;13:497-500.
- 504 33. Campbell LB, Gooden BA, Horowitz JD. Cardiovascular responses to partial and total  
505 immersion in man. *The Journal of physiology*. 1969;202(1):239-50.
- 506 34. Choi B, Crouzet C, Lau WL, Cribbs DH, Fisher MJ. Cerebral Blood Flow in Chronic Kidney  
507 Disease. *Journal of stroke and cerebrovascular diseases : the official journal of National Stroke*  
508 *Association*. 2021;30(9):105702.
- 509 35. Paur H, Wright PT, Sikkil MB, Tranter MH, Mansfield C, O'Gara P, et al. High levels of  
510 circulating epinephrine trigger apical cardiodepression in a beta2-adrenergic receptor/Gi-dependent  
511 manner: a new model of Takotsubo cardiomyopathy. *Circulation*. 2012;126(6):697-706.
- 512 36. Sterin-Borda L, Genaro A, Perez Leiros C, Cremaschi G, Vila Echagüe A, Borda E. Role of nitric  
513 oxide in cardiac beta-adrenoceptor-inotropic response. *Cellular signalling*. 1998;10(4):253-7.
- 514 37. Montone RA, Galiuto L, Meucci MC, Del Buono MG, Vergni F, Camilli M, et al. Coronary slow  
515 flow is associated with a worse clinical outcome in patients with Takotsubo syndrome. *Heart (British*  
516 *Cardiac Society)*. 2020;106(12):923-30.

- 517 38. Sans-Roselló J, Fernández-Peregrina E, Duran-Cambra A, Carreras-Mora J, Sionis A, Álvarez-  
518 García J, et al. Prognostic Value of Microvascular Resistance at Rest in Patients With Takotsubo  
519 Syndrome. *JACC: Cardiovascular Imaging*. 2022;15(10):1784-95.
- 520 39. Horowitz John D, Nguyen Thanh H. Takotsubo Syndrome. *JACC: Cardiovascular Imaging*.  
521 2022;15(10):1796-8.
- 522 40. Dong F, Yin L, Sisakian H, Hakobyan T, Jeong LS, Joshi H, et al. Takotsubo syndrome is a  
523 coronary microvascular disease: experimental evidence. *European Heart Journal*. 2023:ehad274.
- 524 41. Lipowsky HH, Lescanic A. The effect of doxycycline on shedding of the glycocalyx due to  
525 reactive oxygen species. *Microvascular research*. 2013;90:80-5.
- 526 42. Nieuwdorp M, van Haefen TW, Gouverneur MC, Mooij HL, van Lieshout MH, Levi M, et al.  
527 Loss of endothelial glycocalyx during acute hyperglycemia coincides with endothelial dysfunction  
528 and coagulation activation in vivo. *Diabetes*. 2006;55(2):480-6.
- 529 43. Durante W, Behnammanesh G, Peyton KJ. Effects of Sodium-Glucose Co-Transporter 2  
530 Inhibitors on Vascular Cell Function and Arterial Remodeling. *International journal of molecular*  
531 *sciences*. 2021;22(16).
- 532 44. Mavrogeni SI, Manginas A, Papadakis E, Douskou M, Cokkinos D, Katsiva V, et al. Coronary  
533 flow evaluation by TIMI frame count and magnetic resonance flow velocity in patients with coronary  
534 artery ectasia. *Journal of cardiovascular magnetic resonance : official journal of the Society for*  
535 *Cardiovascular Magnetic Resonance*. 2005;7(3):545-50.
- 536 45. Galderisi M, Cicala S, Caso P, De Simone L, D'Errico A, Petrocelli A, et al. Coronary flow  
537 reserve and myocardial diastolic dysfunction in arterial hypertension. *American Journal of Cardiology*.  
538 2002;90(8):860-4.
- 539 46. O'Brien AT, Gil KE, Varghese J, Simonetti OP, Zareba KM. T2 mapping in myocardial disease:  
540 a comprehensive review. *Journal of Cardiovascular Magnetic Resonance*. 2022;24(1):33.

541

542 **Tables**

543 *Table 1: Patient demographics. Non-Gaussian data are shown as median (IQR).*

|                                                             | Total patients (n=284) |
|-------------------------------------------------------------|------------------------|
| Age (years)                                                 | 68 (60-76)             |
| Female, n (%)                                               | 268 (94%)              |
| TTS triggered by a life-threatening physical illness, n (%) | 68 (24%)               |
| Apical TTS, n (%)                                           | 178 (63%)              |
| Diabetes Mellitus, n (%)                                    | 41 (14%)               |
| Hypertension, n (%)                                         | 135 (48%)              |
| Current smoker, n (%)                                       | 36 (13%)               |
| Hemoglobin, g/L                                             | 134 (126-142)          |
| Plasma CRP, mg/L                                            | 9.5 (3.6-31)           |
| Estimated GFR, mL/min                                       | 67 (60-90)             |
| In-hospital mortality, n (%)                                | 4 (1.4%)               |

544

545

546 *Table 2: Acute correlates of frame count: final iteration of backwards stepwise multiple*

547 *logistic regression analysis.*

| Variable                 | $\beta$ | p-value |
|--------------------------|---------|---------|
| Acute GLS                | 0.52    | 0.03    |
| Plasma CRP concentration | -0.44   | 0.06    |
| Estimated GFR            | 0.50    | 0.02    |

548

549 **Figures**

550 *Figure 1: Study flow chart*

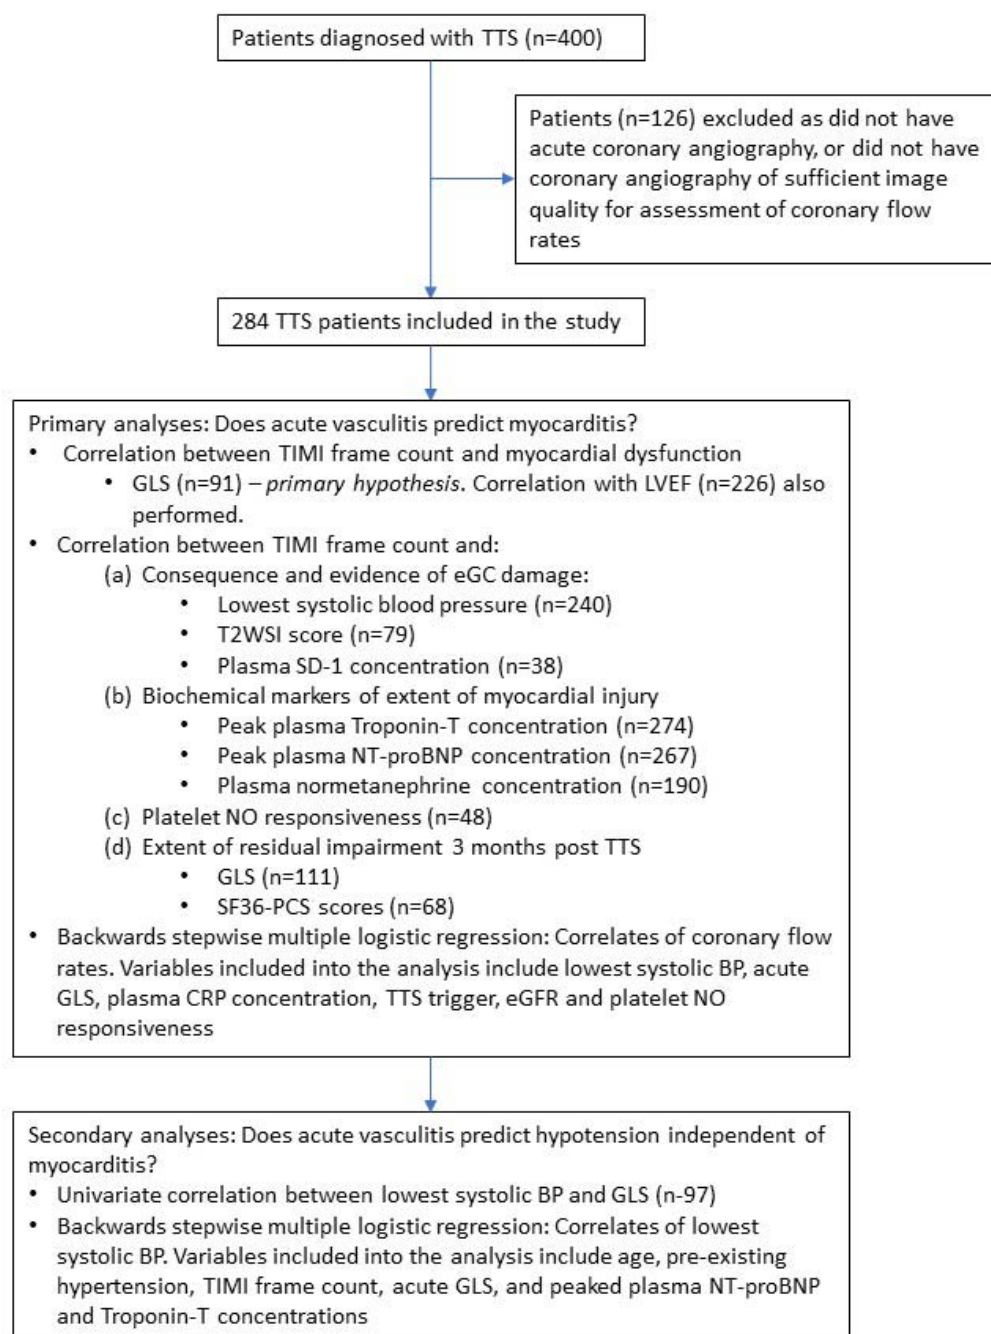

553 *Figure 2: Association between corrected TIMI frame counts and A) estimated glomerular*  
554 *filtration rate (eGFR), and B) lowest systolic blood pressure. Laboratory methodology*  
555 *includes truncation of eGFR values at maximum of 90mL/min.*

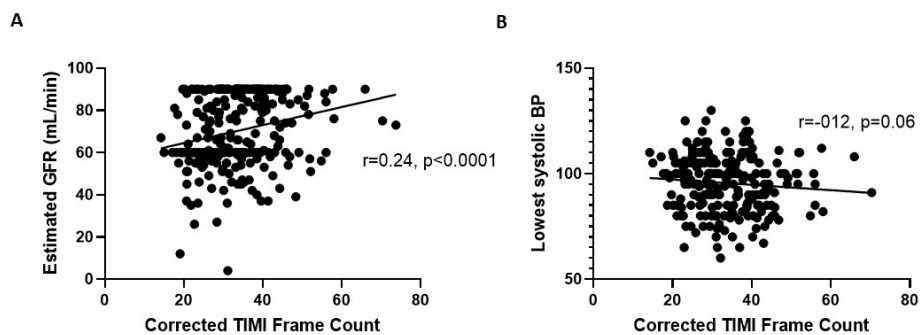

556

557

558 *Figure 3: Primary analysis: association between corrected TIMI frame counts and acute left*  
559 *ventricular global longitudinal strain (GLS).*

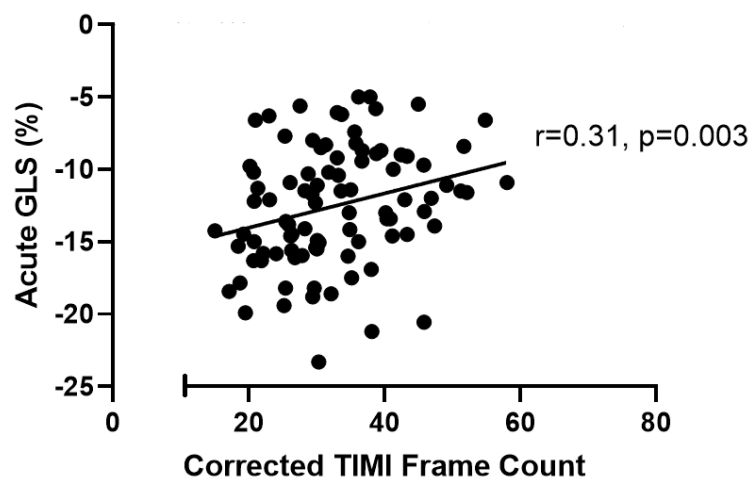

560

Patients diagnosed with TTS (n=400)

Patients (n=126) excluded as did not have acute coronary angiography, or did not have coronary angiography of sufficient image quality for assessment of coronary flow rates

medRxiv preprint doi: <https://doi.org/10.1101/2023.08.18.23294289>; this version posted August 21, 2023. The copyright holder for this preprint (which was not certified by peer review) is the author/funder, who has granted medRxiv a license to display the preprint in perpetuity. It is made available under a [CC-BY-ND 4.0 International license](https://creativecommons.org/licenses/by-nd/4.0/).

284 TTS patients included in the study

#### Primary analyses: Does acute vasculitis predict myocarditis?

- Correlation between TIMI frame count and myocardial dysfunction
  - GLS (n=91) – *primary hypothesis*. Correlation with LVEF (n=226) also performed.
- Correlation between TIMI frame count and:
  - (a) Consequence and evidence of eGC damage:
    - Lowest systolic blood pressure (n=240)
    - T2WSI score (n=79)
    - Plasma SD-1 concentration (n=38)
  - (b) Biochemical markers of extent of myocardial injury
    - Peak plasma Troponin-T concentration (n=274)
    - Peak plasma NT-proBNP concentration (n=267)
    - Plasma normetanephrine concentration (n=190)
  - (c) Platelet NO responsiveness (n=48)
  - (d) Extent of residual impairment 3 months post TTS
    - GLS (n=111)
    - SF36-PCS scores (n=68)
- Backwards stepwise multiple logistic regression: Correlates of coronary flow rates. Variables included into the analysis include lowest systolic BP, acute GLS, plasma CRP concentration, TTS trigger, eGFR and platelet NO responsiveness

#### Secondary analyses: Does acute vasculitis predict hypotension independent of myocarditis?

- Univariate correlation between lowest systolic BP and GLS (n=97)
- Backwards stepwise multiple logistic regression: Correlates of lowest systolic BP. Variables included into the analysis include age, pre-existing hypertension, TIMI frame count, acute GLS, and peaked plasma NT-proBNP and Troponin-T concentrations



**A**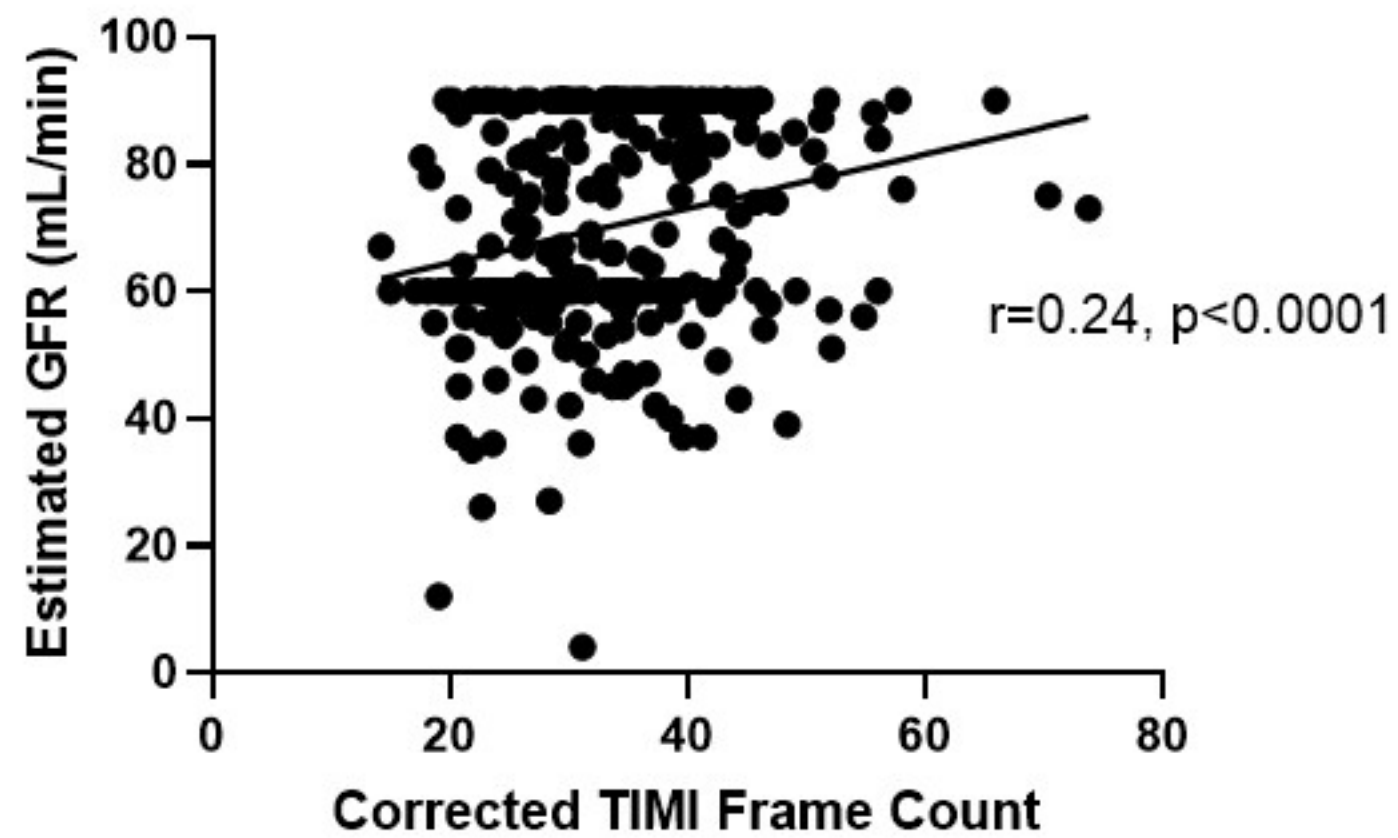**B**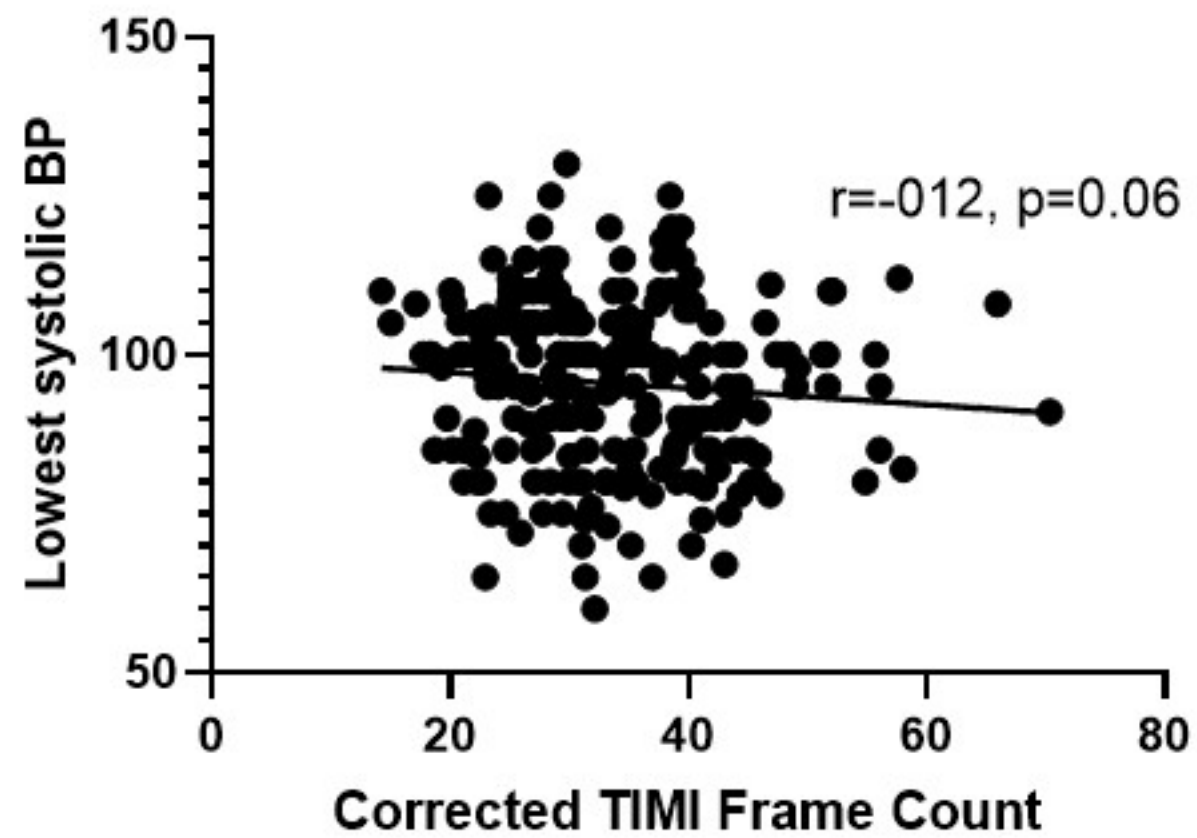

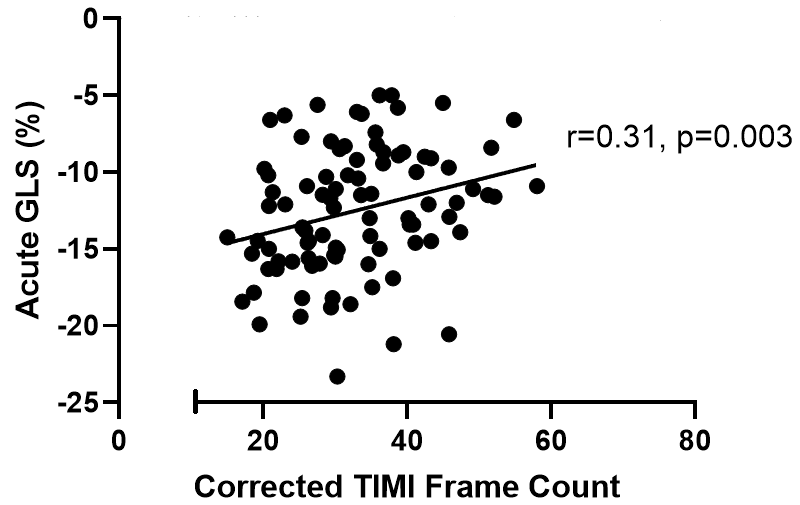

Source: https://medrxiv.org/content/10.1101/2023.08.18.23294289.full.pdf
